# Supplementary material for: TMEM16K is an interorganelle regulator of endosomal sorting
Source: PubMed Central journal article supplement (PMC7335067; doi:10.1038/s41467-020-17016-8), 2020-07-03
Supplement: 41467_2020_17016_MOESM1_ESM.pdf [file 41467_2020_17016_MOESM1_ESM.pdf]

# **TMEM16K is an interorganelle regulator of endosomal sorting**

Maja Petkovic, Juan Oses-Prieto, Alma Burlingame, Lily Yeh Jan, Yuh Nung Jan

## **Supplementary Information**

Content:

- Supplementary Figure 1
- Supplementary Figure 2
- Supplementary Figure 3
- Supplementary Figure 4
- Supplementary Figure 5
- Supplementary Figure 6
- Supplementary Table 1.
  
- Supplementary Video 1
- Supplementary Video 2
- Supplementary Video 3
- Supplementary Data 1

## Supplementary Figure 1

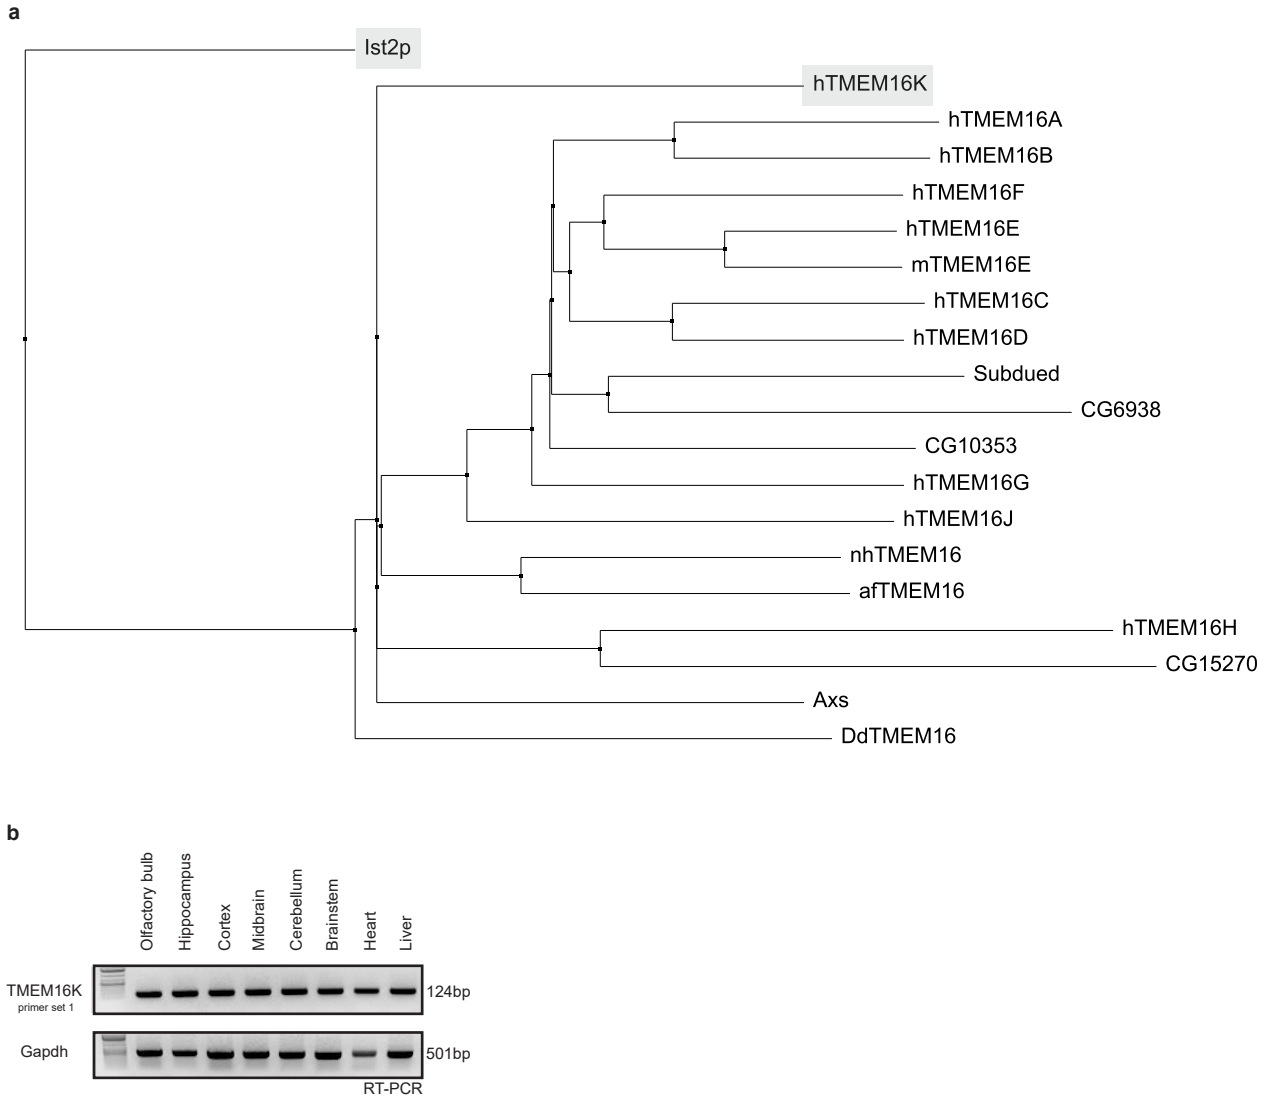

**Supplementary Figure 1.a.** Phylogenetic tree of TMEM16 family of proteins represented with only homolog in yeast *Saccharomyces cerevisiae* (Ist2p), 10 homologs in humans (TMEM16A-H), 5 homologs in *Drosophila* (Axs, Subdued, CG6938, CG10353, CG15270), only homolog in fungi *Aspergillus fumigatus* (afTMEM16), only homolog in fungi *Nectria haematococca* (nhTMEM16) and only homolog in amoebozoia *Dictyostelium discoideum* (DdTMEM16). Representation was constructed in Jalview based on Neighbourhood Joining algorithm generated from the MUSCLE alignment of the sequences.

**b.** RT-PCR from C57BL/6J mouse tissue shows TMEM16K is broadly expressed. RNA was extracted, reverse transcribed and equal amounts of each tissue sample were loaded on agarose gel and revealed with ethidium bromide. Housekeeping gene Gapdh was shown here as a control. DNA Ladder used was GeneRuler 1 kb Plus DNA Ladder from ThermoScientific.

## Supplementary Figure 2

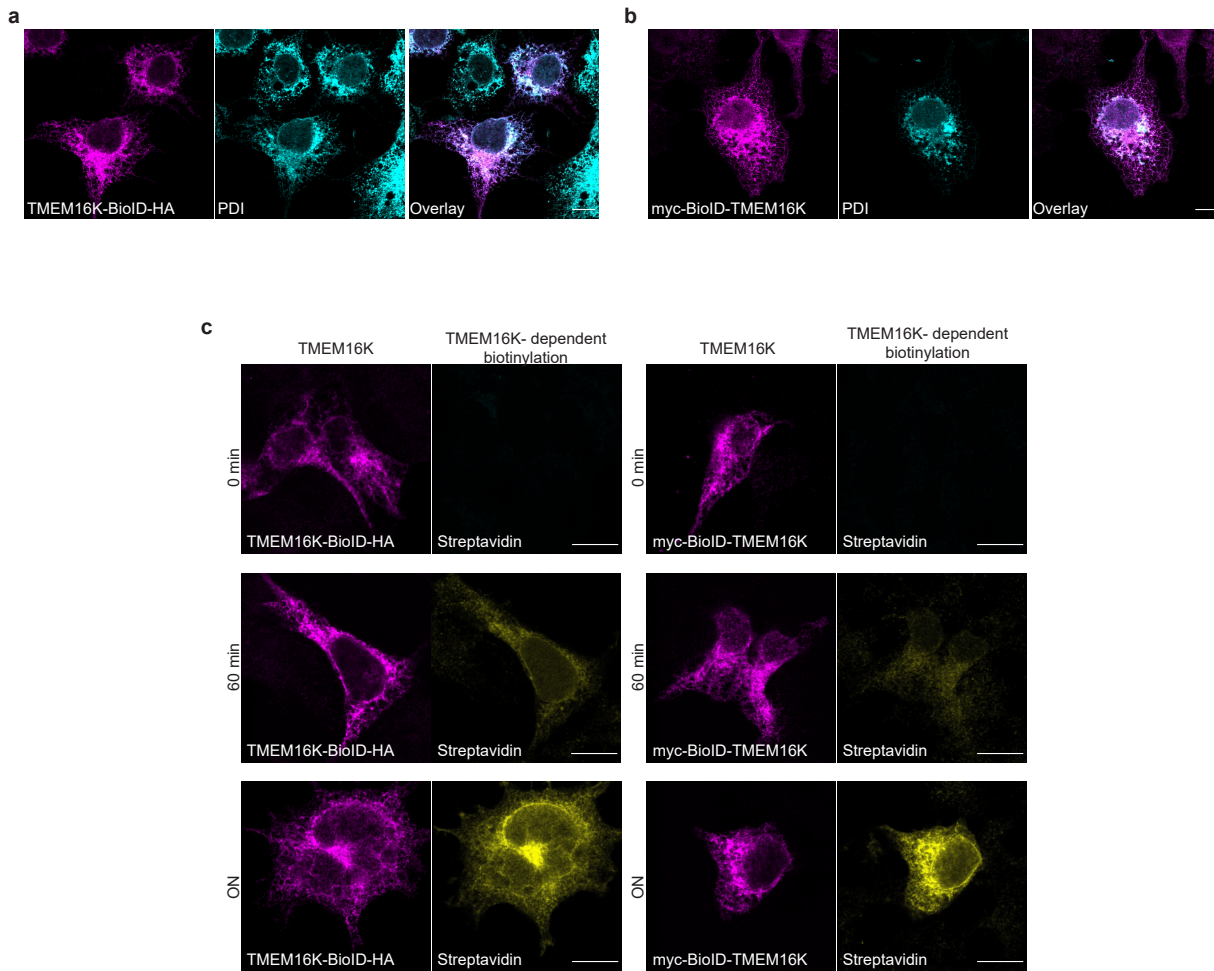

**Supplementary Figure 2. a.** Immunocytochemistry of TMEM16K tagged C-terminally with proximity biotinylation enzyme revealed with anti-HA antibody (magenta) and ER- marker PDI (cyan). Scale bar 10 μm. **b.** Immunocytochemistry of TMEM16K N-terminally tagged to proximity biotinylation enzyme revealed with anti-myc antibody (magenta) and ER-marker marker PDI (cyan). Scale bar 10 μm. **c.** Immunocytochemistry evaluating retention of biotinylation activity of the BioID tagged to TMEM16K. HEK293 cells were transfected with TMEM16K tagged with biotinylation enzyme constructs (magenta) and 24 hours post-transfection were exposed to no biotin, 60 min or overnight (ON) biotin at 50 μM final concentration. Distribution of TMEM16K-mediated proximity biotinylation was revealed with fluorescently conjugated Streptavidin (yellow). Scale bar 10 μm. Images are represented using pseudocolors suitable for color-blind palette.

### Supplementary Figure 3

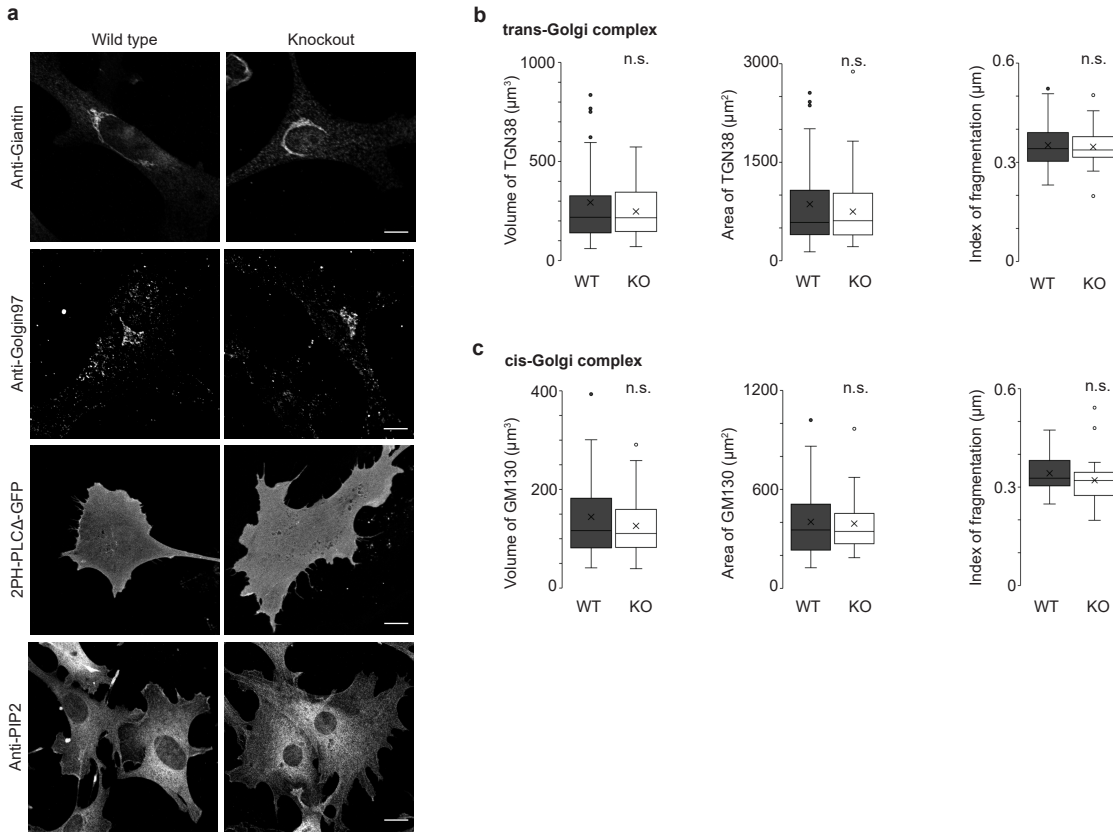

**Supplementary Figure 3.a.** Cellular markers evaluated in WT or TMEM16K KO cells with immunocytochemistry and confocal microscopy. Giantin and Golgin97 are Golgi markers. 2PH-PLC $\Delta$ -GFP and anti-PIP2 antibody are markers of PtdIns(4,5)P<sub>2</sub>. Representative images from 2 independent experiments. Scale bar 10  $\mu\text{m}$ . **b.** Evaluation of 3D trans-Golgi complex morphology from 3D reconstructions of endogenous immunolabeling of the trans-Golgi marker TGN38 in the WT (n=99) and TMEM16K KO (n=82) cells. Data obtained from 3 independent experiments Two-tailed Student t-test. Quantification of the volume (p-value=0.76 n.s.), area (p-value=0.89 n.s.) and index of fragmentation, expressed as the TGN38 volume divided by its area for each cell (p-value=0.13 n.s.). **c.** Evaluation of 3D cis-Golgi complex morphology from 3D reconstructions of endogenous immunolabeling of the cis-Golgi marker GM130 in the WT (n=40) and TMEM16K KO (n=36). Data obtained from 3 independent experiments. Two-tailed Student t-test. Quantification of the volume (p-value=0.32 n.s.), area (p-value=0.81 n.s.) and index of fragmentation, expressed as volume of GM130 divided by its area for each cell (p-value=0.17 n.s.).

## Supplementary Figure 4

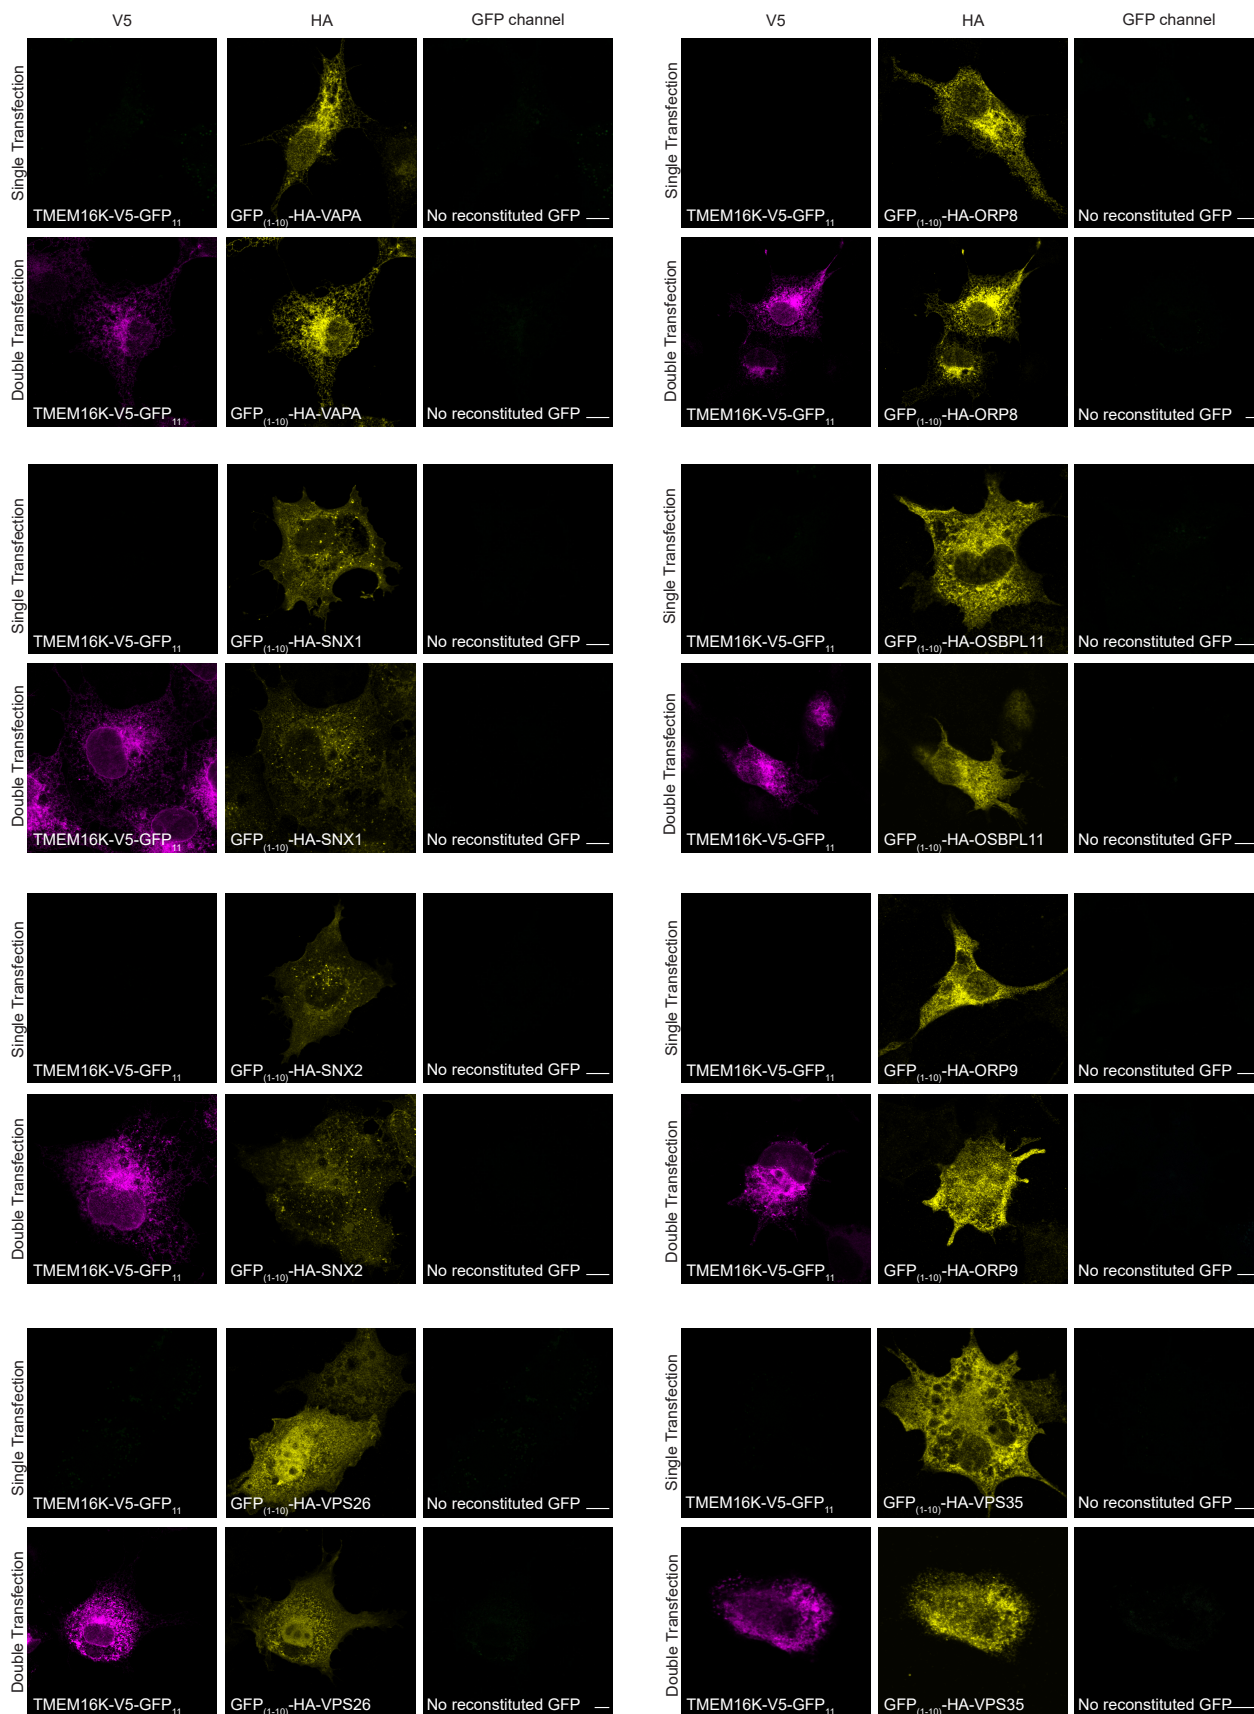

**Supplementary Figure 4.** Split-GFP reconstitution assay. Immunocytochemistry of single and double transfected COS7 cells with TMEM16K-V5-GFP11 (magenta) and tested proteins tagged with GFP(1-10) (yellow). Images are represented using pseudocolors suitable for color-blind palette. Representative images from 3 independent experiments. Scale bar 10  $\mu$ m.

## Supplementary Figure 5

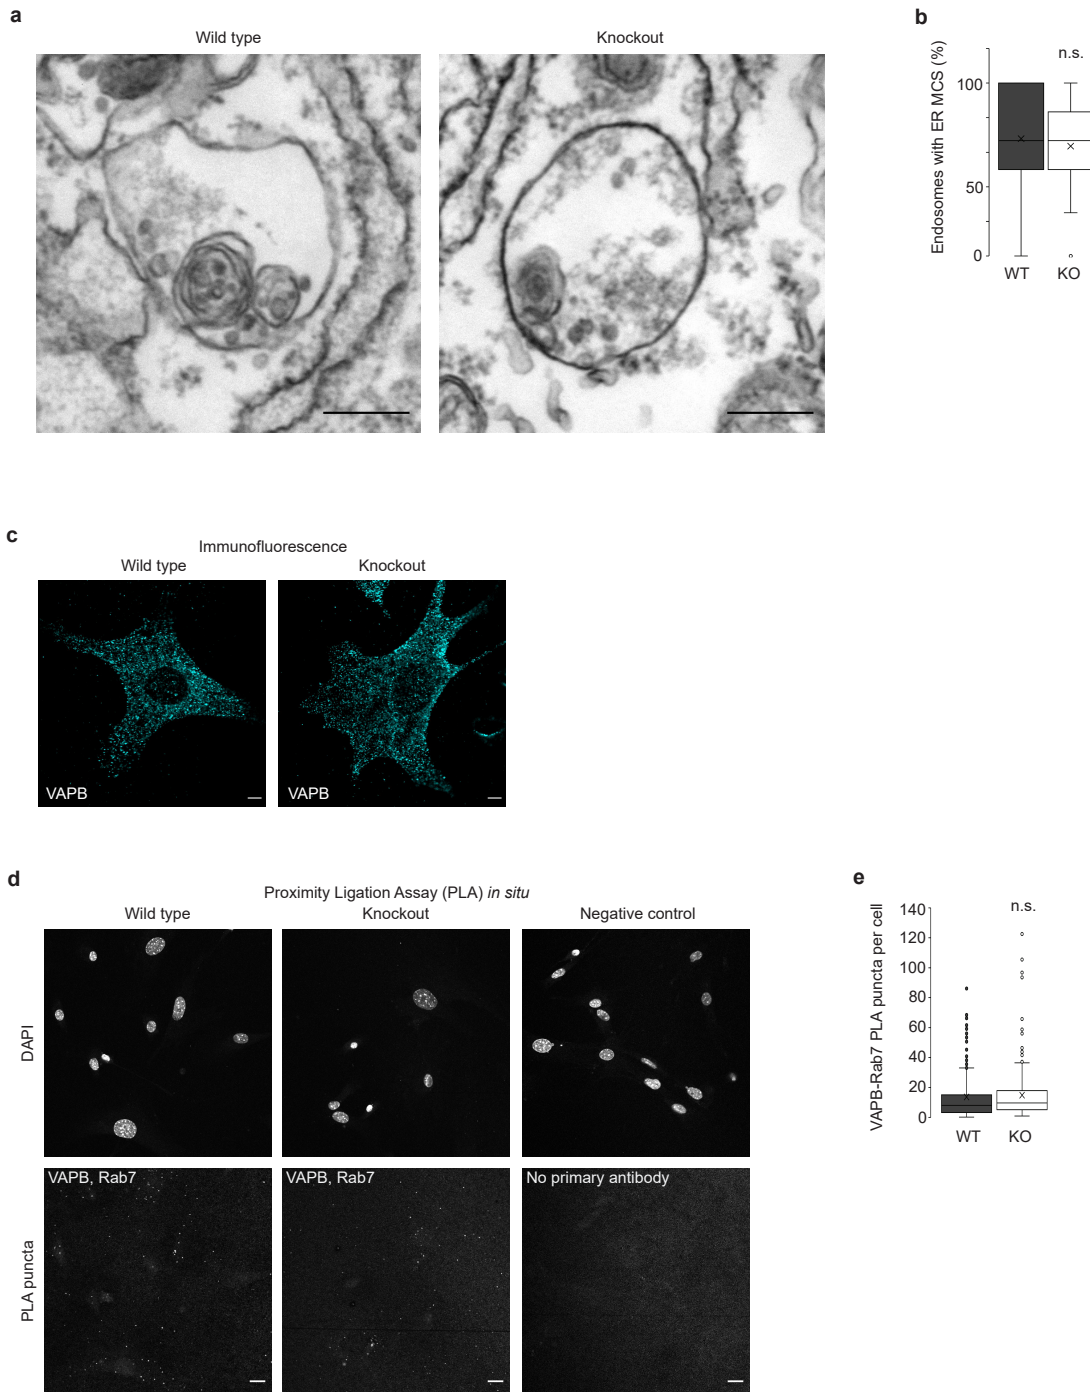

**Supplementary Figure 5. a.** Electron micrographs showing membrane contact sites between ER and endosomes in the WT and TMEM16K KO primary fibroblasts. Scale bar, 200 nm. **b.** The percentage of endosomes with an ER contact site defined as proximity under 30 nm was quantified. Data are from two independent experiments. (n=68 electron micrographs of WT, 71 micrographs of TMEM16K KO). Two-tailed Student t-test, p-value=0.40 n.s. **c.** Immunofluorescence of WT and TMEM16K KO mouse primary fibroblast to evaluate the VAPB antibody. Scale bar, 5  $\mu$ m. **d.** Proximity ligation assay (PLA) *in situ* evaluating the extent of ER- endosome contact sites in WT and TMEM16K KO primary fibroblasts. Cells were fixed, permeabilized, labelled with mouse anti-VAPB and rabbit anti-Rab7 antibodies, or with omitted primary antibodies as indicated to confirm the specificity of the observed signal, and subjected to proximity ligation assay *in situ* (PLA). Nuclei were detected with DAPI. Scale bar, 20  $\mu$ m. **e.** Number of PLA puncta and nuclei from 3 independent experiments was measured, and quantified as PLA puncta per cell. Two-tailed Student t-test, p-value=0.43 n.s. (3 biological replicates, n=231 non-overlapping fields of view with WT cells, 252 with TMEM16K KO cells). Source data are provided as a Source Data file.

## Supplementary Figure 6

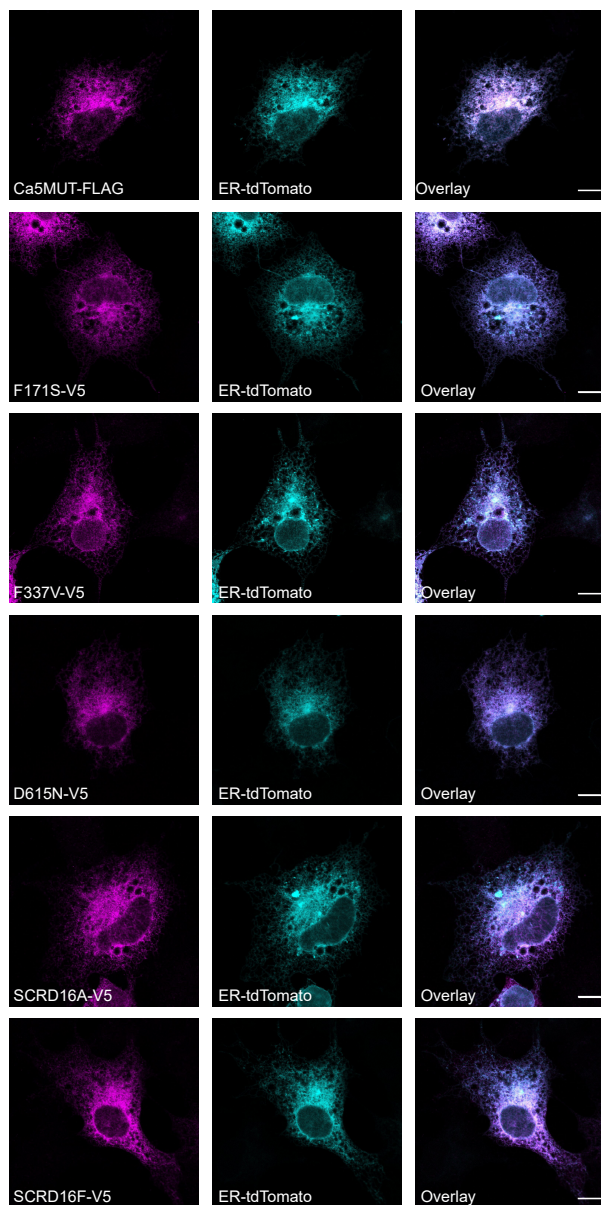

**Supplementary Figure 6.** Immunocytochemistry to evaluate subcellular localization of TMEM16K mutants to endoplasmic reticulum. COS7 were co-transfected with ER-tdTomato labeling ER (cyan) and TMEM16K mutant constructs tagged with FLAG or V5 tag, which was revealed with anti-FLAG or anti-V5 antibody, respectively (magenta). Scale bar 10  $\mu$ m. Images are represented using pseudocolors suitable for color-blind palette.

**Supplementary Table 2.** List of all primers and constructs generated for this study.

TMEM16K genotyping and RT-PCR primers

| Primer name                    | Primer sequence        |
|--------------------------------|------------------------|
| Ano10_257998_F                 | CACTCCCTCATCCCATTCTTG  |
| Ano10_257998_R                 | AGACGGCCACCTTACCACAG   |
| Ano10_257998_F and CAS_R1_Term | TCGTGGTATCGTTATGCGCC   |
| TMEM16K primer set 1.1         | CATGGCCATCATTGGACTGCC  |
| TMEM16K primer set 1.2         | GCACAGCCACGCTTCCACAC   |
| TMEM16K primer set 2.1         | GCCATGCGGGCCTTCACCTA   |
| TMEM16K primer set 2.2         | GCCATGCGGGCCTTCACCTA   |
| Gadph 1.1                      | TGGCCCTCTGGAAAGCTGTG   |
| Gadph 1.2                      | AGTTGGGATAGGGCCTCTTTGC |
| $\beta$ -actin 1.1             | ATGAGCTGCGTGTGGCCCTG   |
| $\beta$ -actin 1.2             | GACGCAGGATGGCGTGAGGG   |

Classical subcloning

| List of constructs  | Backbone                      | RE to cut backbone | Source of insert                  | Primers to amplify insert                                                              | RE to cut the insert |
|---------------------|-------------------------------|--------------------|-----------------------------------|----------------------------------------------------------------------------------------|----------------------|
| myc-BioID-TMEM16K   | pcDNA3.1-myc-BioID (Addgene)  | NotI, KpnI         | pcDNA3.1-TMEM16K-FLAG (Genscript) | F:gcggcggccgctaagagtgactttatcaacgctggatacttgt<br>R:cccggtacctaggtagcttcttcccatcttctggt | NotI, KpnI           |
| TMEM16K-BioID-HA    | BioID-HA (Addgene)            | AgeI, BamHI        | pcDNA3.1-TMEM16K-FLAG (Genscript) | F:gcgaccggtatgagagtgactttatcaacgctggatacttgt<br>R:cccggtaccaaggttagcttcttcccatcttctggt | AgeI, BamHI          |
| mcherry-CAAX        | CIBN-CAAX (Pietro de Camilli) | NheI, AgeI         | mcherry cDNA                      | F:ccgctagcatggtgagcaagggcgaggaggata<br>R:cgaccggtccgctcgagatcttctgtacagtc              | NheI, AgeI           |
| N16F-GFP            | pEGFP-N1 (Clontech)           | NheI, EcoRI        | TMEM16F-GFP (Tien et al. 2009)    | F:ggcgctagcatgcagatgatgactaggaaggtcctgctgaac<br>R:gcggaattctctgataagatccaagggctgct     | NheI, EcoRI          |
| N16K-GFP            | pEGFP-N1 (Clontech)           | NheI, HindIII      | pcDNA3.1-TMEM16K-FLAG (Genscript) | F:gcggtagcaccgccacatgagagtgactttat<br>R:ggcaagctttgtctcccaaatagctacgaatgc              | NheI, HindIII        |
| N16A-GFP            | pEGFP-N1 (Clontech)           | NheI, EcoRI        | TMEM16A-GFP (Tien et al. 2009)    | F:gcggtagccccgggttggtgaggggag<br>R:ggcgaattcgccaaccttctcaccaaaagta                     | NheI, EcoRI          |
| pet15b-His-N16F-GFP | pet15b (Novagene, Millipore)  | NdeI, BlnI         | N16F-GFP                          | F:caagcttccatagaccgtcagatccgctagcatgc<br>R:gatccggtgctcagcgtccatgccgagagtgatccc        | NdeI, BlnI           |



|                            |                                 |            |          |                                                                                  |            |
|----------------------------|---------------------------------|------------|----------|----------------------------------------------------------------------------------|------------|
| <b>pet15b-His-N16K-GFP</b> | pet15b<br>(Novagene, Millipore) | NdeI, BlnI | N16K-GFP | F:caagcttccatgaaaccgccaccatgagagtgact<br>R:gatccgggtgctcagctcgtccatgccgagagtgatc | NdeI, BlnI |
| <b>pet15b-His-N16A-GFP</b> | pet15b<br>(Novagene, Millipore) | NdeI, BlnI | N16A-GFP | F:caagcttccatggttggtgagggagcgcgag<br>R:gatccgggtgctcagctcgtccatgccgagagtgatccc   | NdeI, BlnI |

### Gibson assembly

| List of constructs                     | Backbone                                    | Primers to amplify backbone                                                                                                                                                                                                                                                                                                                                                                                                     | Source of insert                                                                                                                                                                                          | Primers to amplify insert                                                                                                                   |
|----------------------------------------|---------------------------------------------|---------------------------------------------------------------------------------------------------------------------------------------------------------------------------------------------------------------------------------------------------------------------------------------------------------------------------------------------------------------------------------------------------------------------------------|-----------------------------------------------------------------------------------------------------------------------------------------------------------------------------------------------------------|---------------------------------------------------------------------------------------------------------------------------------------------|
| <b>TMEM16K-V5</b>                      | pCDNA3.1-TMEM16K-FLAG<br>(Genescript)       | Backbone is amplified in 2 segments splitting the AmpR gene (increases the probability that picked colony is a positive hit) and adding V5 tag with primers<br><u>Backbone part 1:</u><br>AmpF: gtaagttggccgaggtatcactcatgg<br>R1:gccaagcccagcaaaaggttaggaataggcttaccgtagcttctccca tcttctggtac<br><u>Backbone part 2:</u><br>F2:cctattcctaacccttgctgggcttgactcaacctagcgtgatcagcctg actgt<br>AmpR: ccatgagtataaacactgcccgaacttac | V5 tag was added with primers.                                                                                                                                                                            |                                                                                                                                             |
| <b>TMEM16K-V5-GFP11</b>                | pCDNA3.1-TMEM16K-FLAG<br>(Genescript)       | Backbone is amplified in 2 segments splitting the AmpR gene.<br><u>Backbone part 1:</u><br>AmpF: gtaagttggccgaggtatcactcatgg<br>R1: caccgctccgccaccgtagcttctccatcttctggtac<br><u>Backbone part 2:</u><br>F2:gctgctgggattacatagcgtgatcagcctcgactgt<br>AmpR: ccatgagtataaacactgcccgaacttac                                                                                                                                        | Synthesized by Integrated DNA Technologies<br>ggtggcggaggcgggtggagtaagcctattcctaacccttgctgggcttgactcaaccggtggag gaggctcagggtggcggaggatcaggcgggtgggatcacgtgaccacatggtcctcatgagtatgt aaatgctgctgggattacatag |                                                                                                                                             |
| <b>GFP<sub>(1-10)</sub>-HA-TMEM16K</b> | pcDNA3.1-GFP <sub>(1-10)</sub><br>(Addgene) | Backbone is amplified in 2 segments splitting the AmpR gene.<br><u>Backbone part 1:</u><br>AmpF: gtaagttggccgaggtatcactcatgg<br>R1:gggtaacctccacctccgctccttttcatttgatcttctcaggactgtttgtg<br><u>Backbone part 2:</u><br>F2: gcttaggcggcctaagttaaaccgc<br>AmpR: ccatgagtataaacactgcccgaacttac                                                                                                                                     | pcDNA3.1-TMEM16K-FLAG<br>(Genescript)                                                                                                                                                                     | F:gaaaaaggaggcggaggtggaggttaccttacgatgaccgat tacgcaagagtgacttatcaacgctggatctgt<br>R:gcggtttaaactaaggccgctaagctcaggtagcttctccatc ttctg       |
| <b>GFP<sub>(1-10)</sub>-HA-Rab7</b>    |                                             |                                                                                                                                                                                                                                                                                                                                                                                                                                 | Rab7-tdTomato<br>(UCSF Nikon Imaging Center)                                                                                                                                                              | F:gaaaaaggaggcggaggtggaggttaccttacgatgaccgat tacgcaaccttaggaagaaagtgttctgaaggtt<br>R:gcggtttaaactaaggccgctaagctcagcaactgacgttctg ccg        |
| <b>GFP<sub>(1-10)</sub>-HA-VAPA</b>    |                                             |                                                                                                                                                                                                                                                                                                                                                                                                                                 | pEGFP-N1-VAPA<br>(Addgene)                                                                                                                                                                                | F:gaaaaaggaggcggaggtggaggttaccttacgatgaccgat tacgcagcgaaacacgagcaaatcctgttcc<br>R: cggtttaaactaaggccgctaagctcagagatgaattccataga aagaatccaat |
| <b>GFP<sub>(1-10)</sub>-HA-SNX1</b>    |                                             |                                                                                                                                                                                                                                                                                                                                                                                                                                 | SNX1 cDNA<br>(Ewan Reid)                                                                                                                                                                                  | F:gaaaaaggaggcggaggtggaggttaccttacgatgaccgat tacgcagatccgagtcggaaggggc<br>R:gcggtttaaactaaggccgctaagctcaggagatggccttgcct cag                |

|                                        |                                       |                                                                                                                                                                                                                                                                                                                  |                                                                                              |                                                                                                                                                                                                                                             |
|----------------------------------------|---------------------------------------|------------------------------------------------------------------------------------------------------------------------------------------------------------------------------------------------------------------------------------------------------------------------------------------------------------------|----------------------------------------------------------------------------------------------|---------------------------------------------------------------------------------------------------------------------------------------------------------------------------------------------------------------------------------------------|
| <b>GFP<sub>(1-10)</sub>-HA-SNX2</b>    |                                       |                                                                                                                                                                                                                                                                                                                  | SNX2 cDNA<br>(Marcel Verges)                                                                 | F:gaaaaaggaggcggagggtgaggttacccctacgatgaccggat<br>tacgcagcggccgagagggaacc<br>R:<br>gcggttaaactaaggccgcctaagcctaggaatggcttggctca<br>ggtag                                                                                                    |
| <b>GFP<sub>(1-10)</sub>-HA-VPS26</b>   |                                       |                                                                                                                                                                                                                                                                                                                  | VPS26A cDNA<br>(Transomics)                                                                  | F:gaaaaaggaggcggagggtgaggttacccctacgatgaccggat<br>tacgcaatgatgttcttgaggccttttggcca<br>R:gcggttaaactaaggccgcctaagctcacattcaggctgtcggc<br>agatgc                                                                                              |
| <b>GFP<sub>(1-10)</sub>-HA-ORP8</b>    |                                       |                                                                                                                                                                                                                                                                                                                  | ORP8 cDNA<br>(Francesca<br>Giordano)                                                         | F:gaaaaaggaggcggagggtgaggttacccctacgatgaccggat<br>tacgcagagggaggttggcagatggagaac<br>R:gcggttaaactaaggccgcctaagcctactgaacatgaagttat<br>tatgactgaag                                                                                           |
| <b>GFP<sub>(1-10)</sub>-HA-OSBPL11</b> |                                       |                                                                                                                                                                                                                                                                                                                  | OSBPL11 cDNA<br>(Transomics)                                                                 | F:gaaaaaggaggcggagggtgaggttacccctacgatgaccggat<br>tacgcacagggggggaaccagtgtcc<br>R:gcggttaaactaaggccgcctaagcctactctgctgtgtgtgtt<br>ggaattattt                                                                                                |
| <b>GFP<sub>(1-10)</sub>-HA-VPS35</b>   |                                       |                                                                                                                                                                                                                                                                                                                  | VPS35 cDNA<br>(Marcel Verges)                                                                | F:gaaaaaggaggcggagggtgaggttacccctacgatgaccggat<br>tacgcacctacaacacagcagctcccctcag<br>R:gcggttaaactaaggccgcctaagctaaaggatgagacctcat<br>aaattggccc                                                                                            |
| <b>GFP<sub>(1-10)</sub>-HA-ORP9</b>    | GFP <sub>(1-10)</sub> -HA-<br>TMEM16K | Backbone is amplified in 2 segments splitting the AmpR<br>gene.<br><u>Backbone part 1:</u><br>AmpF: gtaagttggcccaggttatcactcatgg<br>R1-ORP9:<br>gcctcctcctccgccctgcgtaatccggatcacgtaagggtaacc<br><u>Backbone part 2:</u><br>F2-ORP9:gctgccaagcattaggcttagcggccttaagttaaaccgc<br>AmpR: ccatgagtataactgcccgaacttac | ORP9 cDNA<br>(Transomics)                                                                    | F:ggcggcggaggaggagcaggttagaatcaattaacactgcatt<br>gtgttc<br>R:cttaaggccgcctaagcctaagcttggcagcaccagaagacg                                                                                                                                     |
| <b>mClover3-TMEM16K</b>                | pSBtet-RB<br>(Addgene)                | Backbone is amplified in 2 segments splitting the AmpR<br>gene.<br><u>Backbone part 1:</u><br>AmpF:gtaagttggcccaggttatcactcatgg<br>R1:gccctctcaccatggtggcctcagaggccttgc<br><u>Backbone part 2:</u><br>F2:gaaggagctacctgaggctgcaggccaagcttc<br>AmpR:ccatgagtataactgcccgaacttac                                    | pKanCMV-<br>mClover3-<br>mRuby3<br>(Addgene)<br>pcDNA3.1-<br>TMEM16K-<br>FLAG<br>(Genscript) | Insert 1 (mClover3):<br>F1:ctctgaggccaccatggtgagcaagggcgaggagc<br>R1:gataaagtcactctcattctcgcttgcctaccatcgg<br>Insert 2 (TMEM16K):<br>2F:gagcagaaggcgaagaatagagtacttatcaacgctggtctt<br>gtgagag<br>2R:cttgctgacaggctcaggttagcttctctccatctcctg |
| <b>TMEM16K-V5-<br/>mNeonGreen</b>      | TMEM16K-V5-<br>GFP11                  | Backbone is amplified in 2 segments splitting the AmpR<br>gene.<br><u>Backbone part 1:</u><br>AmpF:gtaagttggcccaggttatcactcatgg<br>NG-R1: GCCCTTGCTCACCATTGAtccaccaccgccTGATcc<br><u>Backbone part 2:</u><br>AmpR:ccatgagtataactgcccgaacttac<br>NG-F2: GACGAGCTGTACAAGtagcgtgatcagcctcagctgt                     | mNeonGreen-<br>mRuby2-FRET-<br>10 (UCSF Nikon<br>Imaging Center<br>Library)                  | Insert (mNeonGreen)<br>NG-F1:<br>CAGgcggtggtggaTCAATGGTGAGCAAGGGCGAGG<br>AG<br>NG-R2:<br>ggctgatcagcctaCTTGTACAGCTCGTCCATGCCCA<br>TC                                                                                                        |
| <b>SCRD16A-V5</b>                      | TMEM16K-V5                            | Backbone is amplified in 2 segments splitting the AmpR<br>gene.                                                                                                                                                                                                                                                  | Synthesized by Integrated DNA Technologies                                                   |                                                                                                                                                                                                                                             |

|                           |                  |                                                                                                                                                                                                                                                                                                                                                |                                                                                                                                                                                    |                                                                                                                                                  |
|---------------------------|------------------|------------------------------------------------------------------------------------------------------------------------------------------------------------------------------------------------------------------------------------------------------------------------------------------------------------------------------------------------|------------------------------------------------------------------------------------------------------------------------------------------------------------------------------------|--------------------------------------------------------------------------------------------------------------------------------------------------|
|                           |                  | <u>Backbone part 1:</u><br>R1: gccgtaaacctcatccatgatctcaatcacaacggcataaacaatgctgg<br>AmpF: gtaagttggccgaggtatcactcatgg<br><u>Backbone part 2:</u><br>F2: gccttctgctcaagttcctgaattgcttcgctcactcttctac<br>AmpR: ccatgagtataaacactgcgccaacttac                                                                                                    | gtgattgagatcatggatgaagtttacggctgcattgccaggtggctaccaagattgaggtccaaa<br>gacagagaagagcittgaggagaggtaacctcaaggcctctgctcaagttcctgaattgctc                                               |                                                                                                                                                  |
| <b>SCRD-16F-V5</b>        | TMEM16-V5        | Backbone is amplified in 2 segments splitting the AmpR gene.<br><u>Backbone part 1:</u><br>R1: ctcgtagatcgtgttcgatctcaatcacaacggcataaacaatgctgg<br>AmpF: gtaagttggccgaggtatcactcatg<br><u>Backbone part 2:</u><br>F2: gatgttctgtccag ttctgaattgcttcgctcactcttctac<br>AmpR: ccatgagtataaacactgcgccaacttac                                       | Synthesized by Integrated DNA Technologies<br>gtgattgagatcatgaacacgatctacgagaaggtggccatcatgatcaccactcgagctccca<br>aggaccagacgattatgagaacagcctgacctgaagatgttctgttccagttcctgaattgctc |                                                                                                                                                  |
| <b>SCRD16A-V5-GFP11</b>   | TMEM16K-V5-GFP11 | Backbone is amplified in 2 segments splitting the AmpR gene.<br><u>Backbone part 1:</u><br>R1: CTCTCACAAGTATCCAGCGTTGATAAAGTCACTCTCAT<br>AmpF: gtaagttggccgaggtatcactcatg<br><u>Backbone part 2:</u><br>F2: CCAGGAAGATGGGAAGGAAGCTACC<br>AmpR: ccatgagtataaacactgcgccaacttac                                                                   | SCRD16A-V5                                                                                                                                                                         | All respective inserts were amplified with following primers<br>K-F: ATGAGAGTGACTTTATCAACGCTGGATACTTGTG<br>AGAG<br>K-R: GGTAGCTTCCTTCCCATCTTCTGG |
| <b>SCRD16F-V5-GFP11</b>   |                  |                                                                                                                                                                                                                                                                                                                                                | SCRD16F-V5                                                                                                                                                                         |                                                                                                                                                  |
| <b>F171S-V5-GFP11</b>     |                  |                                                                                                                                                                                                                                                                                                                                                | F171S-V5                                                                                                                                                                           |                                                                                                                                                  |
| <b>F337V-V5-GFP11</b>     |                  |                                                                                                                                                                                                                                                                                                                                                | F337-V5                                                                                                                                                                            |                                                                                                                                                  |
| <b>D615N-V5-GFP11</b>     |                  |                                                                                                                                                                                                                                                                                                                                                | D615N-V5                                                                                                                                                                           |                                                                                                                                                  |
| <b>deltaN16K-V5-GFP11</b> | TMEM16K-V5-GFP11 | Backbone is amplified in 2 segments splitting the AmpR gene, and removing the N-terminal domain of TMEM16K<br><u>Backbone part 1:</u><br>AmpF: gtaagttggccgaggtatcactcatgg<br>dNtR: GTCATGCAGCGGGAACACcatgccagctgggtctccctatag<br><u>Backbone part 2:</u><br>dNtF: gaccaagctggcatgGTGTTCCCGCTGCATGACTGA<br>AmpR: ccatgagtataaacactgcgccaacttac |                                                                                                                                                                                    |                                                                                                                                                  |

## Site-directed mutagenesis

| List of constructs                                                            | Backbone                                  | Site-directed mutagenesis primers                                                                                                                                                                                                                                                                                      | Comments                                                                             |
|-------------------------------------------------------------------------------|-------------------------------------------|------------------------------------------------------------------------------------------------------------------------------------------------------------------------------------------------------------------------------------------------------------------------------------------------------------------------|--------------------------------------------------------------------------------------|
| <b>Ca5MUT-FLAG<br/>(TMEM16K-<br/>E448Q/D497N/E500Q/E529Q/D533N-<br/>FLAG)</b> | pCDNA3.1.-<br>TMEM16K-FLAG<br>(Genscript) | 448-F: CTGAACCAAGTCGTAcAATCTCTTCTTCCTT<br>448-R: AAGGAAGAAGAGATTgTACGACTTGGTTCAG<br>497-500-F: CTGGGAACCTTTGATaATTACCTGcAGTTGTTCCCTGCAGT<br>497-500-R: ACTGCAGGAACAACtGcAGGTAATtATCAAAGGTTCCAG<br>529-533-F: GTTAAATAACTTCACTcAAGTCAACTCAaATGCCTTGAAAATGTG<br>529-533-R: CACATTTTCAAGGCATtTGAGTTGACTTgAGTGAAGTTATTTAAC | All 5 mutations were introduced in one multiplex-site-directed mutagenesis reaction. |
| <b>F171S-V5</b>                                                               | TMEM16K-V5                                | F171S.F: GGCATCGTGACCCAAGTGTcCCCCTGCAT<br>F171S.R: ATGCAGCGGGgACACTTGGGTCACGATGCC                                                                                                                                                                                                                                      |                                                                                      |
| <b>F337-V5</b>                                                                | TMEM16K-V5                                | F337V.F: TATGTCATGATGATCTACgTTGACATGGAGGACTGGG<br>F337V.R: CCCAGTCCTCCATGTCAAcGTAGATCATCATGACATA                                                                                                                                                                                                                       |                                                                                      |
| <b>D615N-V5</b>                                                               | TMEM16K-V5                                | D615N.F: TCGCATTTGCCATCCCTaATAAACCACGGCACATC<br>D615N.R: GATGTGCCGTGGTTTATtAGGGATGGCAAATGCCA                                                                                                                                                                                                                           |                                                                                      |
| <b>GFP<sub>(1-10)</sub>-HA-Rab7 T22N</b>                                      | GFP(1-10)-HA-<br>Rab7                     | T22N-R: CTGGTTCATGAGTGAgtTCTTCCCCTCCAGA<br>T22N-F: CTGGAGTCGGGAAGAcTCACTCATGAACCAGT                                                                                                                                                                                                                                    |                                                                                      |
| <b>GFP<sub>(1-10)</sub>-HA-Rab7 Q67L</b>                                      | GFP(1-10)-HA-<br>Rab7                     | Q67L-R: GAGACTGGAACCGTTCCaGTCTGCTGTGTCCC<br>Q67L-F: GGGACACAGCAGGACtGGAACGGTTCAGTCT                                                                                                                                                                                                                                    |                                                                                      |
